# Supplementary material for: The Osteocyte Stimulated by Wnt Agonist SKL2001 Is a Safe Osteogenic Niche Improving Bioactivities in a Polycaprolactone and Cell Integrated 3D Module
Source: MDPI journal article supplement (doi:10.3390/cells11050831), 2022-02-28
Supplement: s1 [file s1]

Supplementary data

**Title:** The osteocyte stimulated by Wnt agonist SKL2001 is a safe osteogenic niche improving bioactivities in a polycaprolactone and cell integrated 3D module

*s1: SKL2001-stimulated osteocytes promote osteoblast differentiation of ST2 cells in a dose-dependent way.*

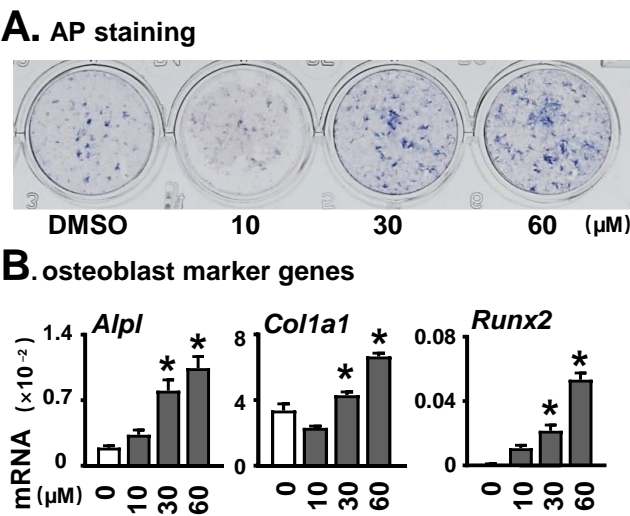

**Figure S1.** Effects of SKL2001 amount in the treatment of osteocytic MLO-Y4 on osteoblast differentiation of mouse stromal cell ST2. S24 treated MLO-Y4 cells at concentrations as indicated for 24 hours, and then S24 was washed away. ST2 cells were co-cultured with these treated MLO-Y4 for 3 days and were tested for osteoblast differentiation by AP staining (A) and the expression osteoblast marker genes (B). \*  $p < 0.05$  versus DMSO control by One Way Anova,  $n = 3$ . Ct, cycle number detected by qPCR machine for a relative amount assay for relative amount of target genes.

*s2: Different effects of S24-treated NIH 3T3 fibroblasts and MLO-Y4 osteocytes on osteoblast differentiation of bone marrow stromal cell ST2*

**Materials and Methods:**

NIH 3T3 cells were purchased from Yuchi Biology (Shanghai, China). Cells were cultured in DMEM (Invitrogen, USA) supplemented with 10% fetal bovine serum, 1% glutamine, 1% penicillin/streptomycin, and 1% gentamicin [1].

AP staining was performed to measure osteoblast differentiation in the co-cultures of S24-treated NIH 3T3 or MLO-Y4 for 24 hours, and then co-cultured with ST2 or ST2/NIH 3T3 cells, respectively for 3 days.

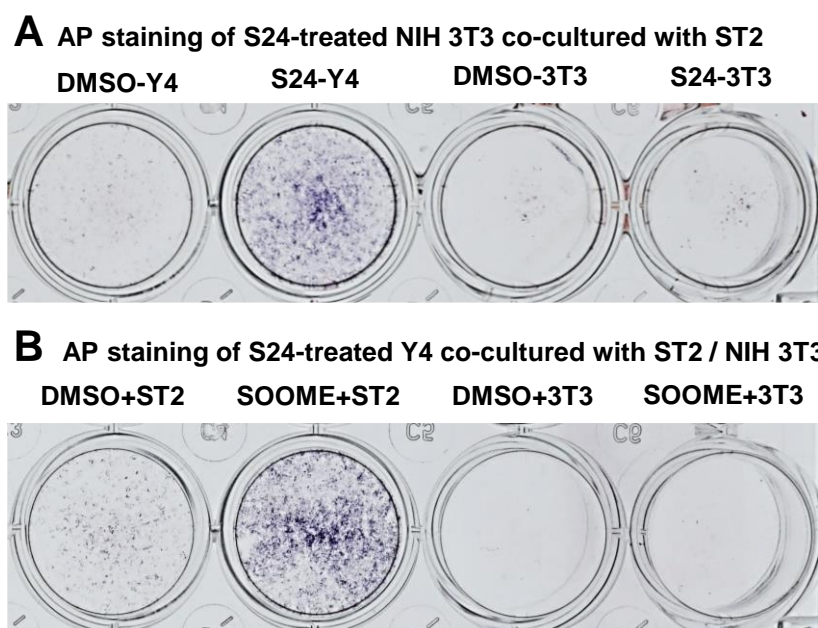

**Figure S2.** Different effects of S24-treated NIH 3T3 / MLO-Y4 on osteoblast differentiation of bone marrow stromal cell ST2. NIH 3T3 (**A**) or MLO-Y4 (**B**) was treated with 60μm S24 for 24 hours, and then co-cultured with ST2 or NIH 3T3, respectively for 3 days. Y4, MLO-Y4; 3T3, NIH 3T3. DMSO, DMSO-treated MLO-Y4; SOOME, S24-treated MLO-Y4.

[1] W. Rao, G. Xie, Y. Zhang, S. Wang, Y. Wang, H. Zhang, F. Song, R. Zhang, Q. Yin, L. Shen, H. Ge, OVA66, a tumor associated protein, induces oncogenic transformation of NIH3T3 cells, PLoS One 9 (2014) e85705-e85705. 10.1371/journal.pone.0085705.

### A osteoblast marker genes in the co-culture with ST2

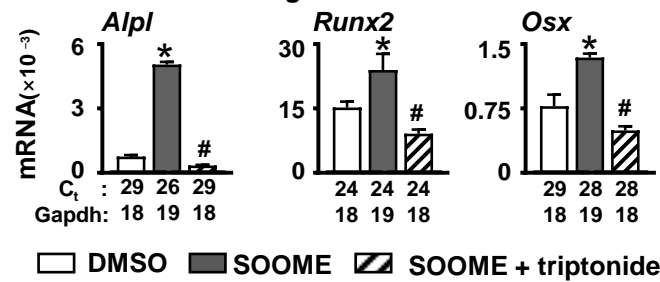

### B AP staining of the co-culture with ST2

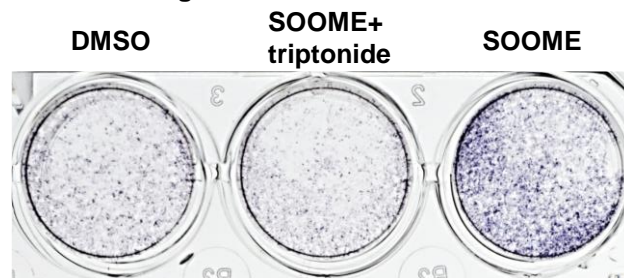

### C Wnt target genes in the co-culture with ST2

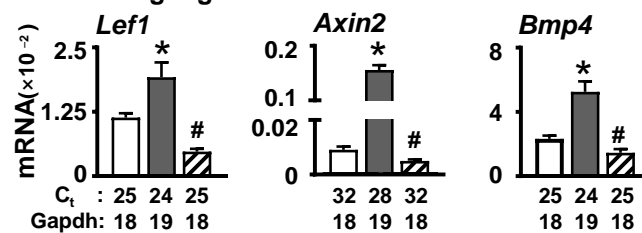

### D EP4 in the co-culture

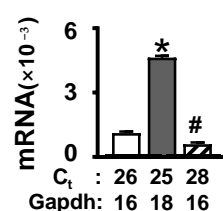

### E EP4 in SOOME

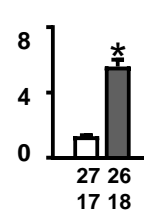

**Figure S3.** Effects of potential osteogenic factor(s) from SOOME on osteoblast differentiation of ST2 cells. The co-culture system of SOOME and ST2 was treated with Wnt inhibitor triptonide (10nM) for 3 days. Assays of osteoblast differentiation were performed by (A) qPCR detection of the expression of osteoblast marker genes and (B) AP staining; qPCR detection of the expression of Wnt target genes (C) and EP4 (a PGE2 receptor) in the co-culture system (D) or in SOOME (E). \**p* < 0.05 versus DMSO control, # *p* < 0.05 versus SOOME, by One Way Anova, *n* = 3. Ct, cycle number detected by qPCR machine for a relative amount of target genes.

s4: MLO-Y4 cells treated with S24 hardly change the expression of marker genes of osteoblasts and osteocytes.

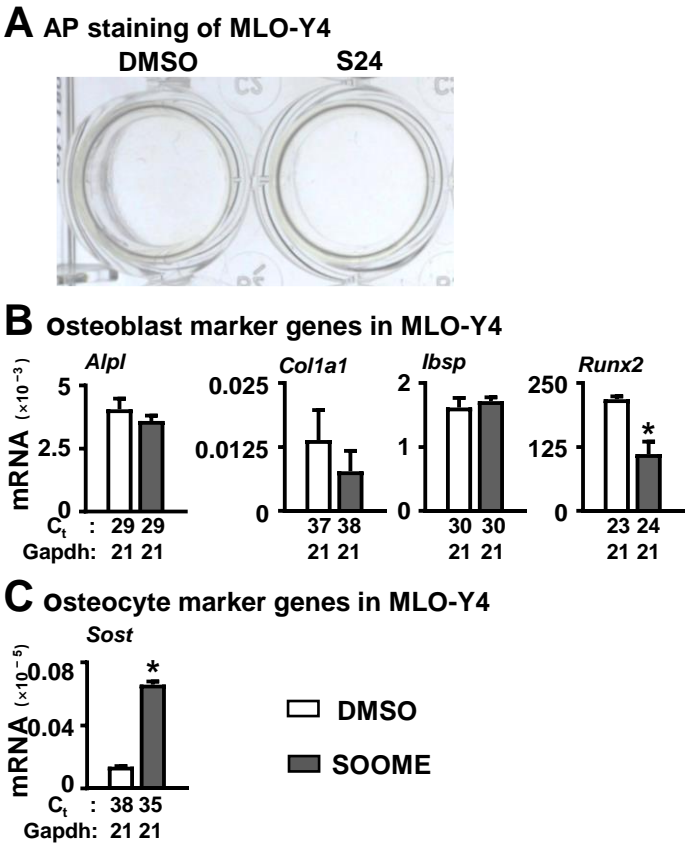

**Figure S4.** Detection of MLO-Y4 and SOOME on the expression of osteoblastic and osteocytic marker genes. (A) AP staining; qPCR detection of the expression of marker genes of osteoblast's (B) and osteocyte marker genes (C) in MLO-Y4. \*  $p < 0.05$  versus DMSO control, by  $t$ -test,  $n=3$ .

*s5: ST2 cells in the hydrogels are much less differentiated into osteoblasts without MLO-Y4*

**AP staining of PCI3D modules of ST2 cells with or without MLO-Y4**

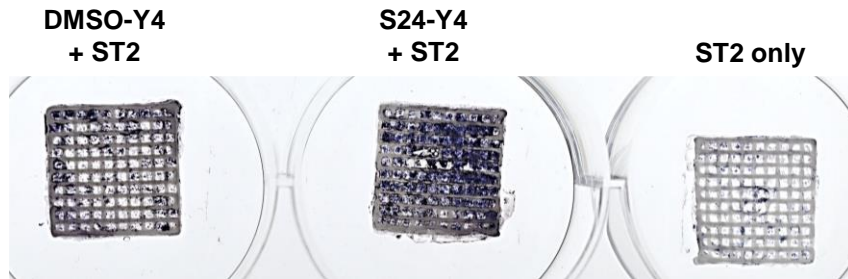

**Figure S5.** Hydrogel has less effect on osteoblast differentiation of ST2 cells without treated or untreated MLO-Y4 cells. AP staining was performed on PCI3D printed modules of PCL bundle and cell-laden hydrogel. Bone marrow stromal cell line ST2 was printed with or without MLO-Y4 at 4:1 cell ratio for 7-day co-culture. MLO-Y4 was treated with 60  $\mu$ M S24 or DMSO (control) for 24 hours before 3D bioprinting. Y4, MLO-Y4; S24, SKL2001.
